# Supplementary material
Source: PubMed Central journal article supplement (PMC2945430)
Supplement: NIHMS231064-supplement-1_si_001.pdf [file NIHMS231064-supplement-1_si_001.pdf]

## Supporting Information for

### **Withaferin A, a Cytotoxic Steroid from *Vassobia breviflora*, Induces Apoptosis in Human Head and Neck Squamous Cell Carcinoma**

Abbas K. Samadi, <sup>†</sup> Xiaoqin Tong, <sup>‡</sup> Ridhwi Mukerji, <sup>†</sup> Huaping Zhang, <sup>‡</sup> Barbara N. Timmermann, <sup>\*‡</sup> and Mark S. Cohen<sup>\*†</sup>

Department of Surgery, School of Medicine, University of Kansas Medical Center, Kansas City, KS 66160 and Department of Medicinal Chemistry, School of Pharmacy, University of Kansas, Lawrence, KS 66045

-----  
\*Authors to whom correspondence should be addressed.

Tel: (913) 588- 2706. Fax: (913) 588-4593, Email: [mcohen@kumc.edu](mailto:mcohen@kumc.edu) (M.S.C.). Tel: [\(785\)864-4844](tel:(785)864-4844). Fax: (785)864-5326. Email: [btimmer@ku.edu](mailto:btimmer@ku.edu) (B.N.T.)

<sup>†</sup> University of Kansas Medical Center.

<sup>‡</sup> University of Kansas.

## Table of Contents

- S1.  $^1\text{H}$  NMR spectrum (500 MHz,  $\text{CDCl}_3$ ) of withaferin A (**1**).
- S2. Co-chromatography of an authentic sample from Chromadex and **1**.
- S3. Mass and IR data of **1**.
- S4. **Table S1.**  $\text{IC}_{50}$  values of an extract and an active fraction of *Vassobia breviflora*<sup>a,b</sup>

S1.  $^1\text{H}$  NMR spectrum (500 MHz,  $\text{CDCl}_3$ ) of Withaferin A (**1**).

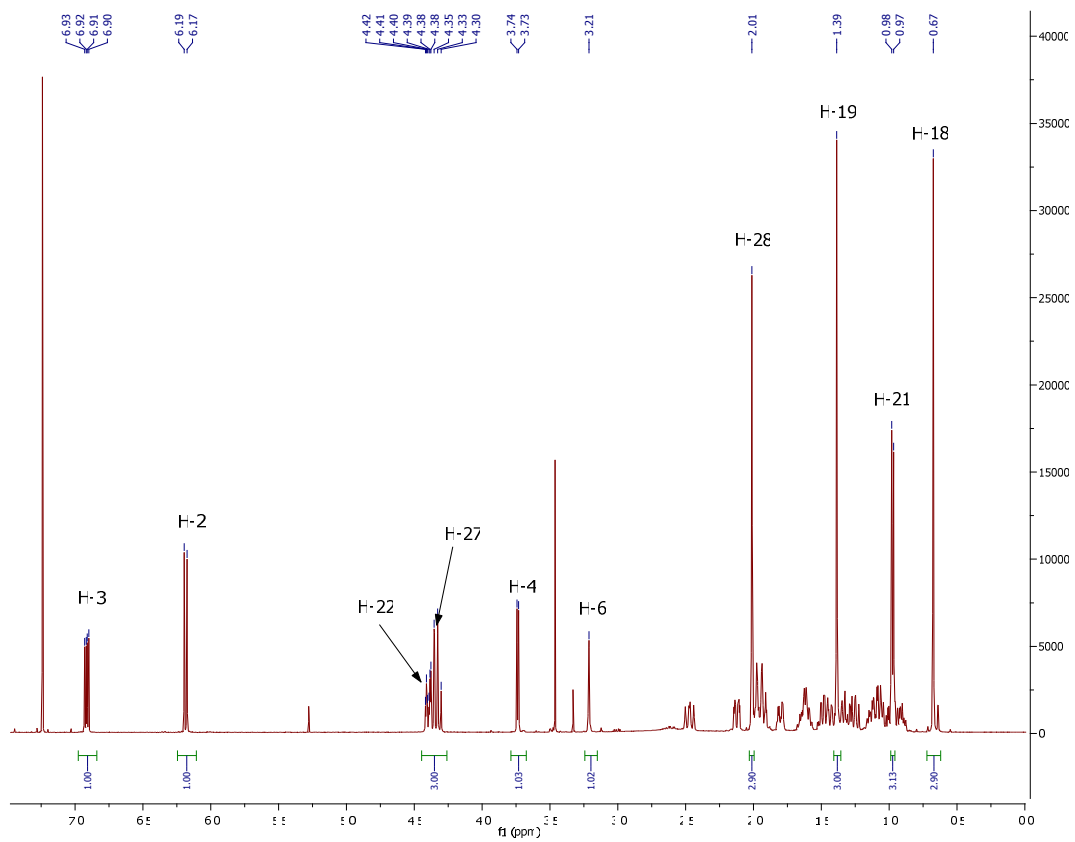

S2. Co-chromatography of an authentic sample from Chromadex and **1**.

Mobile phase: A-water, B-Acetonitrile; isocratic 50% B for 30 min

Flow rate: 1 mL/minute

Injection Vol.: 10  $\mu$ L

Injection Conc.: 1.0 mg/mL in Methanol

Detection: 254 nm

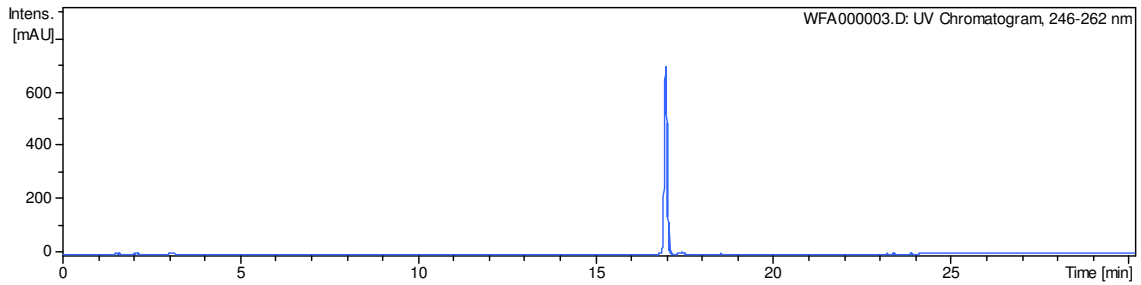

S3. Mass and IR data of **1**.

**Withaferin A.** IR (thin film)  $\nu_{\max}$ : 3421, 2942, 1678, 732  $\text{cm}^{-1}$ ; HR-MS ( $m/z$ ): 471.2730  $[\text{M} + \text{H}]^+$   
493.2571  $[\text{M} + \text{Na}]^+$  (calc. for  $\text{C}_{38}\text{H}_{38}\text{O}_6\text{Na}$ , 493.2566  $\text{C}_{38}\text{H}_{39}\text{O}_6$ , 493.2747).

S4. **Table 1.** IC<sub>50</sub> values of an extract and an active fraction of *Vassobia breviflora*<sup>a,b</sup>

| <b>Extractions/Fractions</b>                | <b>MDA1986</b> | <b>JMAR</b> | <b>UM-SCC-2</b> | <b>JHU011</b> |
|---------------------------------------------|----------------|-------------|-----------------|---------------|
| Crude CHCl <sub>2</sub> -MeOH (1:1) extract | 1.1            | 7.3         | 0.94            | 1.1           |
| Fraction 5 after SPE column                 | 0.90           | 1.0         | 1.0             | 1.1           |

<sup>a</sup> Data expressed in µg/ml.

<sup>b</sup> For protocol used, see Experimental Section.
